# Supplementary material for: Controlled design of PtPd nanodendrite ornamented niobium oxynitride nanosheets for solar-driven water splitting
Source: Royal Society of Chemistry journal article supplement (doi:10.1039/c8nj03411g), 2018-01-01
Supplement: c8nj03411g1.pdf [file c8nj03411g1.pdf]

### Supporting information

#### Controlled Design of PtPd Nanodendrites Ornamented Niobium Oxynitride Nanosheets for Solar-Driven Water Splitting

Yahia H. Ahmad,<sup>a†</sup> Kamel Eid,<sup>a†</sup> Khaled A Mahmoud,<sup>b</sup> and Siham Y. Al-Qaradawi,<sup>a\*</sup>

<sup>a</sup> Department of Chemistry and Earth Sciences, College of Arts and Sciences, Qatar University, Doha 2713, Qatar. E-mail: [siham@qu.edu.qa](mailto:siham@qu.edu.qa)

<sup>b</sup> Qatar Environment and Energy Research Institute (QEERI), Hamad Bin Khalifa University (HBKU), P.O. Box 5825, Doha, Qatar

<sup>†</sup>Yahia H. Ahmed and Kamel Eid contributed equally to the work.

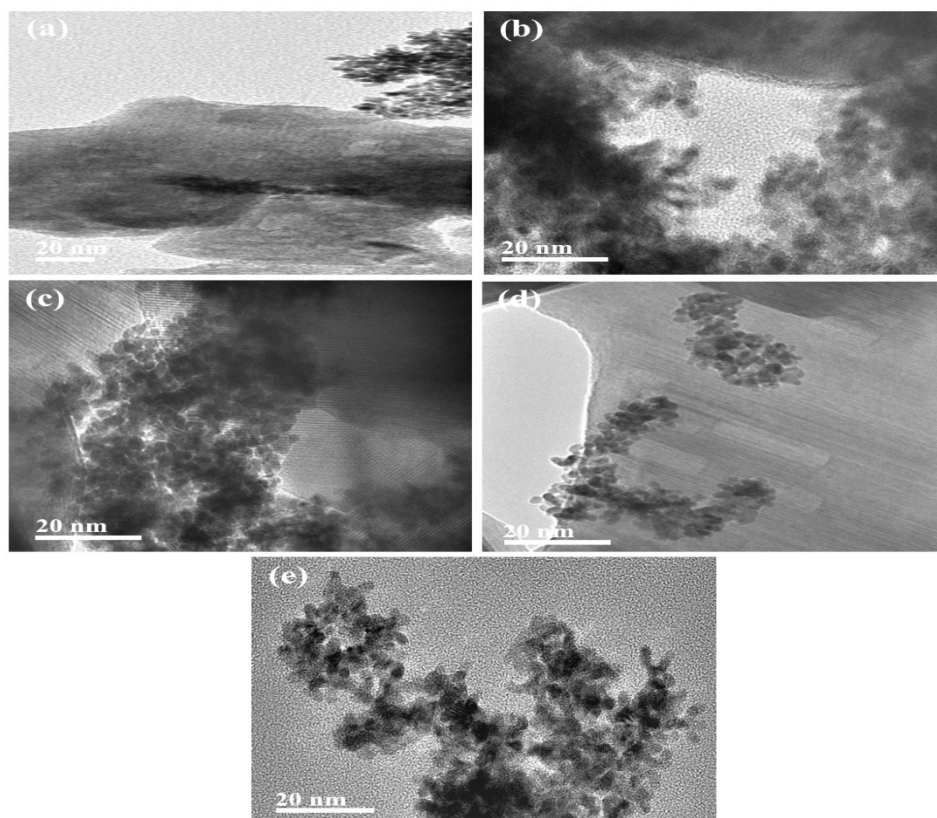

**Fig. S1.** (a) TEM image of PtPd/NbON prepared in the absence of ultrasonic irradiation, (b) using AA (0.05 M), (c) without Pluronic F127, (d) using 1mg of Pluronic F127, and (e) PtPd NDs obtained in the absence of NbON.

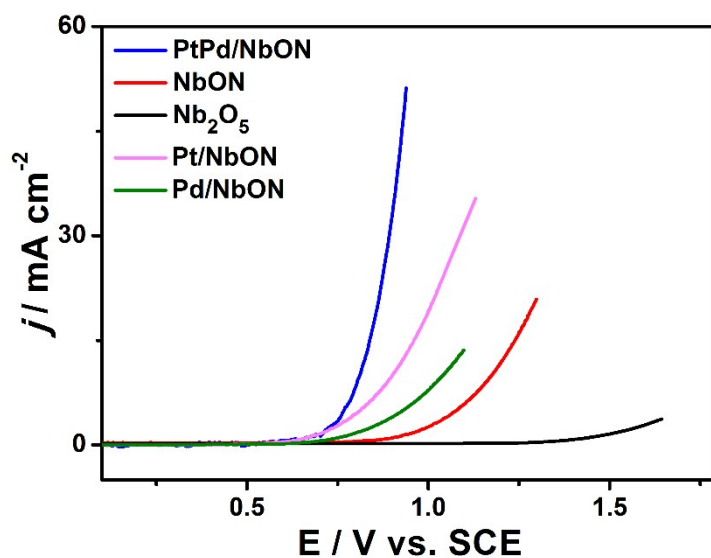

**Fig. S2.** LSV of OER on different catalysts measured in an aqueous solution of 0.1 M KOH at a scan rate of  $10 \text{ mV s}^{-1}$  at room temperature.

**Table S1.** Equivalent circuit parameters of different photoanodes in 0.1 M KOH.

|                         | $R_{\text{soln}} (\Omega)$ | $R_1 (\text{k}\Omega)$ | $Y_1$ | $\alpha_1$ | $R_2 (\text{k}\Omega)$ | $Y_2$ | $\alpha_2$ |
|-------------------------|----------------------------|------------------------|-------|------------|------------------------|-------|------------|
| $\text{Nb}_2\text{O}_5$ | 11.27                      | 2.266                  | 7.79  | 0.934      | 1.548                  | 41.3  | 0.917      |
| NbON                    | 9.31                       | 0.617                  | 23.14 | 0.929      | 0.173                  | 793.6 | 0.861      |
| PtPd/NbON               | 8.85                       | 0.041                  | 468.3 | 0.959      | 0.082                  | 884.4 | 0.915      |

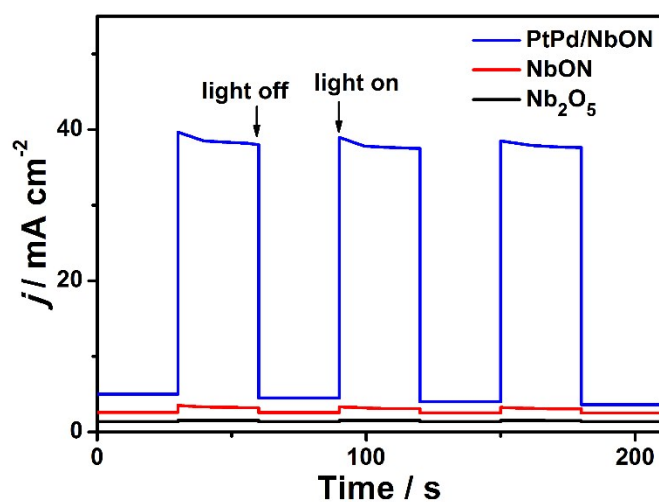

**Fig. S3** Transient photocurrent (J-t) measured for 200 s at a constant external bias of 0.58 V vs. SCE.
